# Supplementary material for: High mass loading porous CoNi2S4 nanosheets with ultrahigh areal capacity for flexible supercapacitors
Source: Royal Society of Chemistry journal article supplement (doi:10.1039/d3ta05970g), 2023-12-21
Supplement: d3ta05970g1.pdf [file d3ta05970g1.pdf]

Electronic Supplementary Material (ESI) for Journal of Materials Chemistry A.

Supporting Information

## High mass loading porous $\text{CoNi}_2\text{S}_4$ nanosheets with ultrahigh areal capacity for flexible supercapacitors

Qian Chen,<sup>a,b</sup> Ziqiang Wu,<sup>a,b</sup> Lili Zhu,<sup>a,b</sup> Changdian Li,<sup>a,b</sup> Xuebin Zhu,<sup>\*ab</sup> Yuping Sun<sup>a,c,d</sup>

<sup>a</sup>Key Laboratory of Materials Physics, Institute of Solid State Physics, HFIPS, Chinese Academy of Sciences, Hefei 230031, China

<sup>b</sup>University of Science and Technology of China, Hefei 230026, China

<sup>c</sup>High Magnetic Field Laboratory, HFIPS, Chinese Academy of Sciences, Hefei 230031, China

<sup>d</sup>Collaborative Innovation Center of Advanced Microstructures, Nanjing University, Nanjing 210093, China

\*Corresponding author.

E-mail addresses: [xbzhu@issp.ac.cn](mailto:xbzhu@issp.ac.cn) (X. Z).

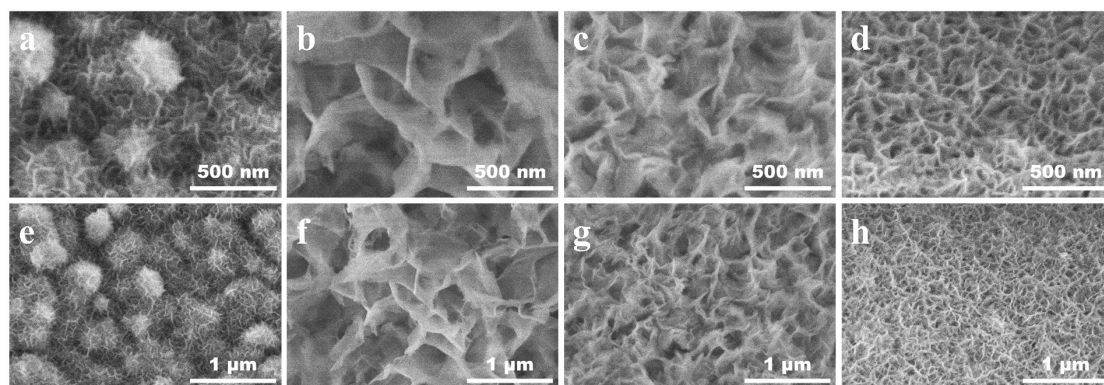

Fig. S1 FE-SEM image of (a, e) Ni-1000, (b, f) Co-1000, (c, g) NiCo2-1000 and (d, h) CoNi2-1000.

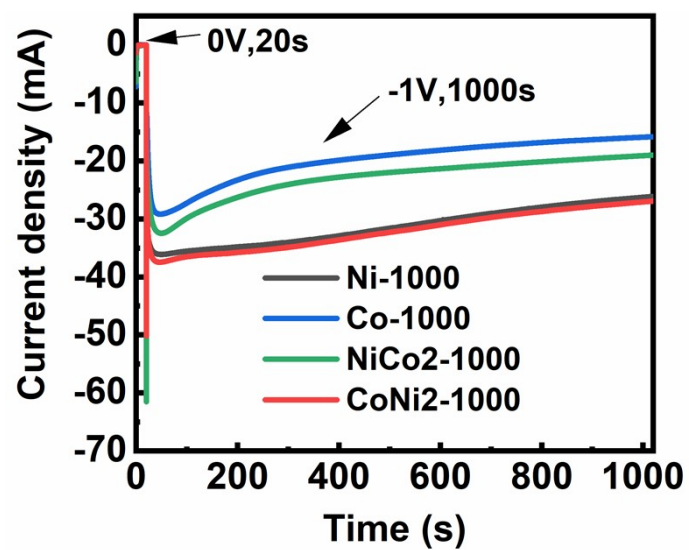

Fig. S2 The variation curve of current with time in electrodeposition process.

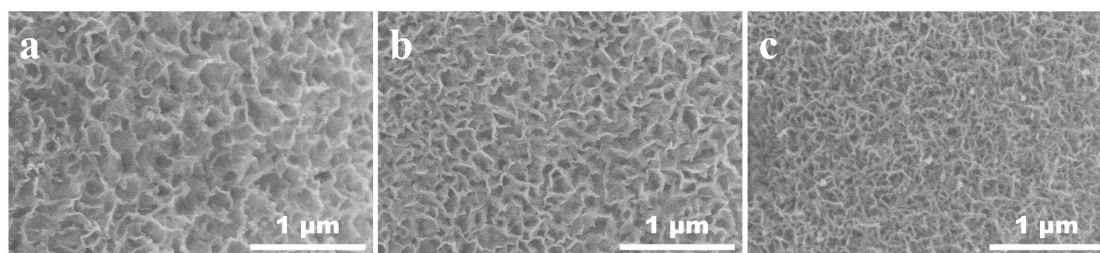

Fig. S3 FE-SEM image of (a)  $\text{CoNi}_2\text{S}_4\text{-200}$ , (b)  $\text{CoNi}_2\text{S}_4\text{-500}$  and (c)  $\text{CoNi}_2\text{S}_4\text{-1500}$ .

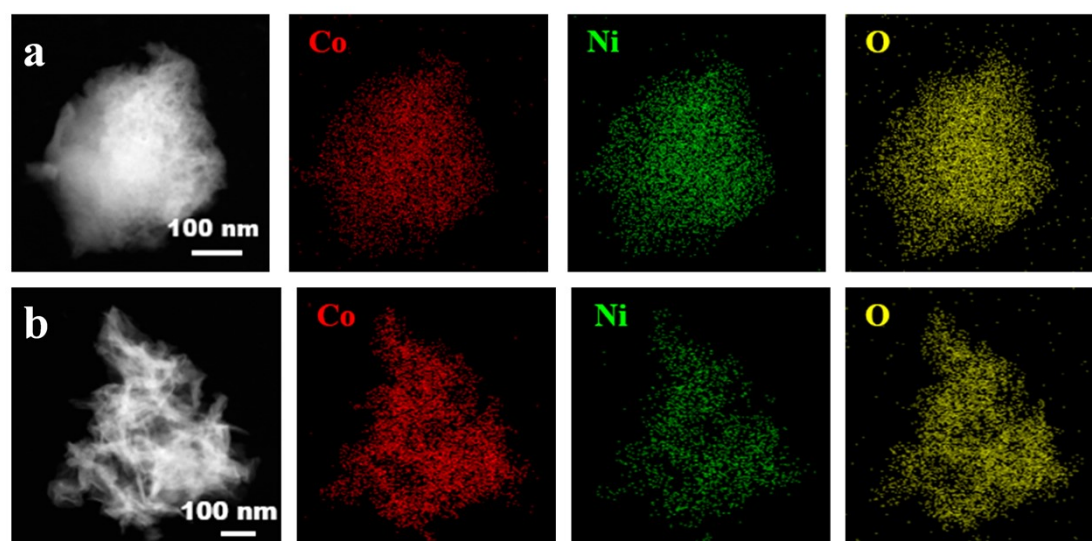

**Fig. S4** Elemental mappings of (a) CoNi<sub>2</sub>-1000 and (b) NiCo<sub>2</sub>-1000 for Co, Ni and O.

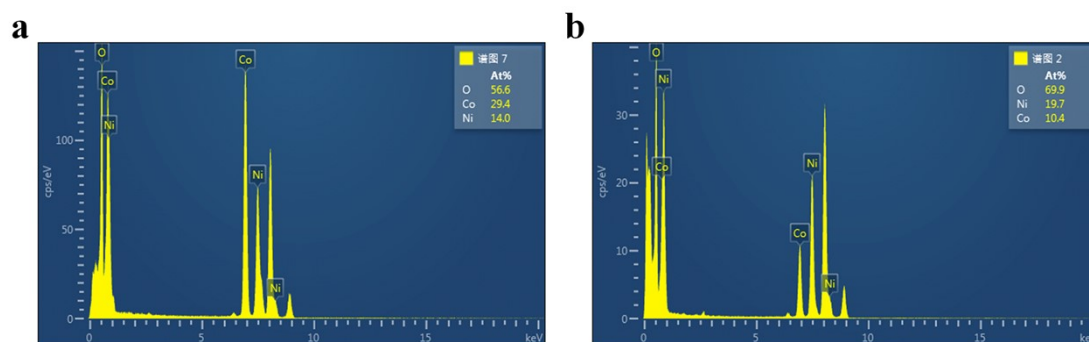

**Fig. S5** EDX spectrum of (a) NiCo<sub>2</sub>-1000 and (b) CoNi<sub>2</sub>-1000.

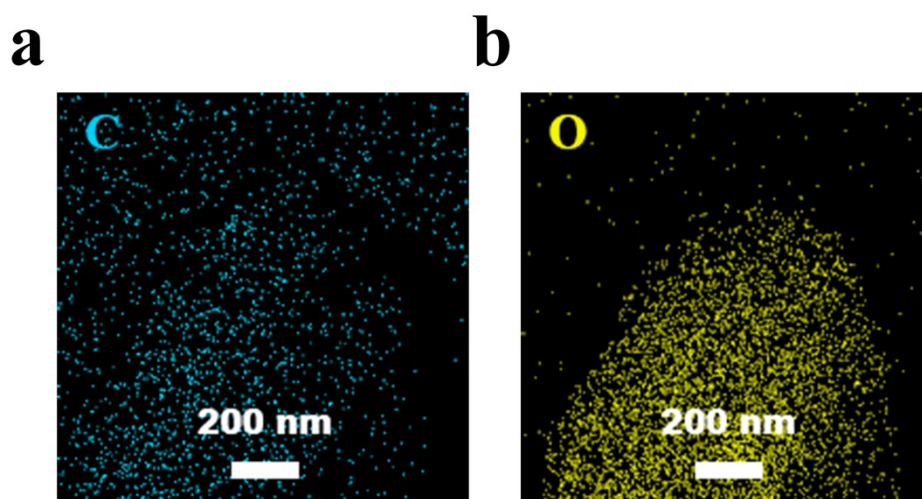

**Fig. S6** Elemental mappings of CoNi<sub>2</sub>S<sub>4</sub>-1000 for (a) C and O.

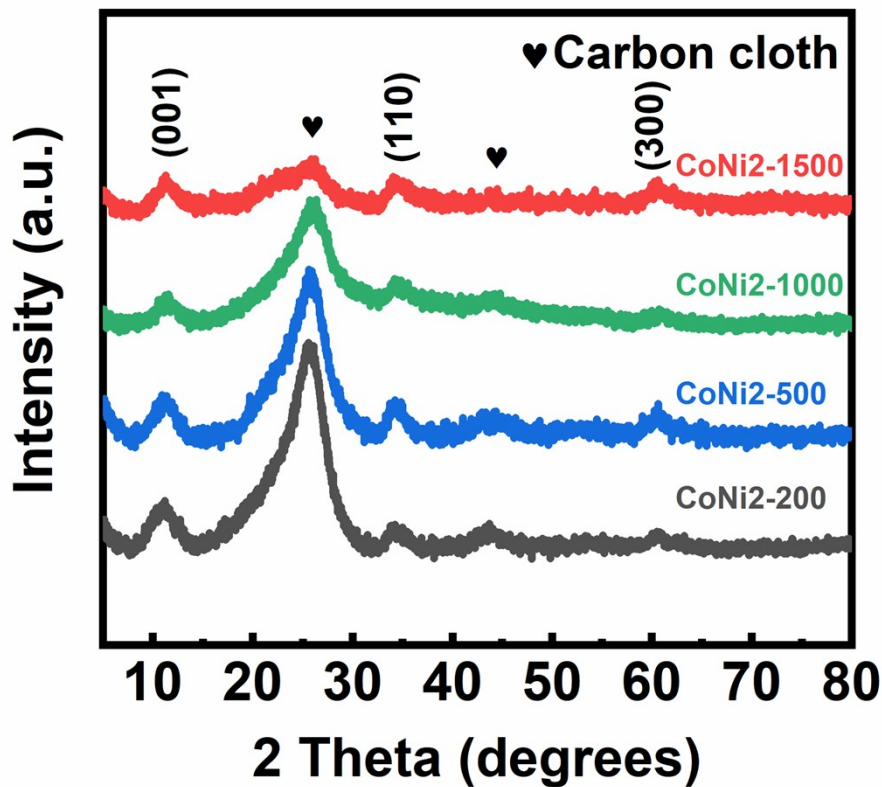

Fig. S7 XRD pattern of CoNi<sub>2</sub>-200, CoNi<sub>2</sub>-500, CoNi<sub>2</sub>-1000 and CoNi<sub>2</sub>-1500.

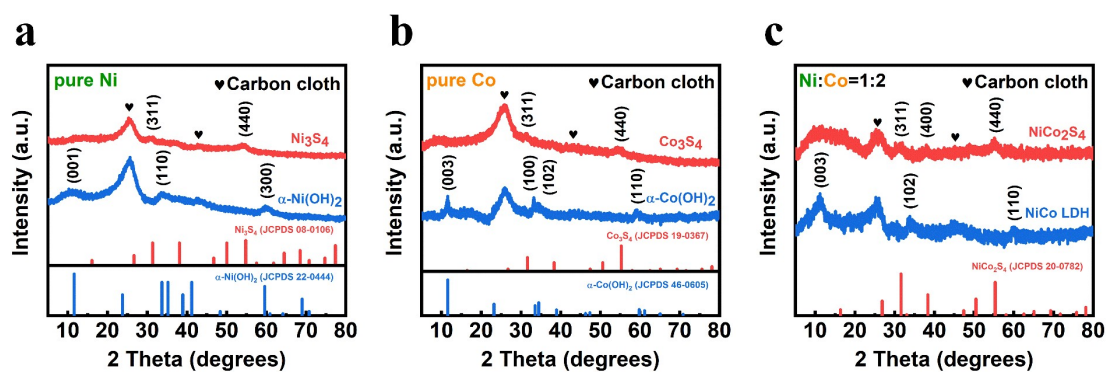

Fig. S8 XRD pattern of Ni<sub>3</sub>S<sub>4</sub>-1000, Co<sub>3</sub>S<sub>4</sub>-1000 and NiCo<sub>2</sub>S<sub>4</sub>-1000.



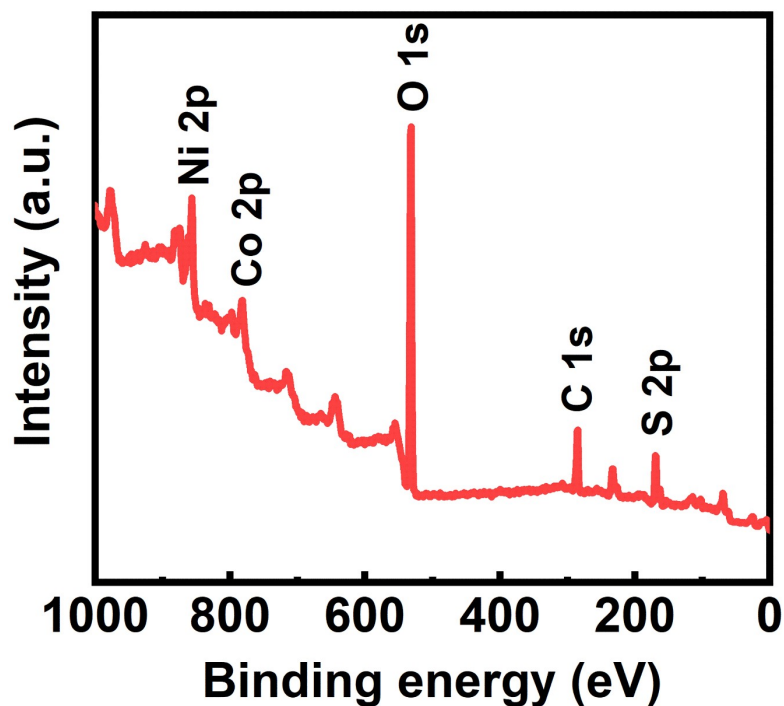

Fig. S9 XPS spectra spectrum for CoNi<sub>2</sub>S<sub>4</sub>-1000.

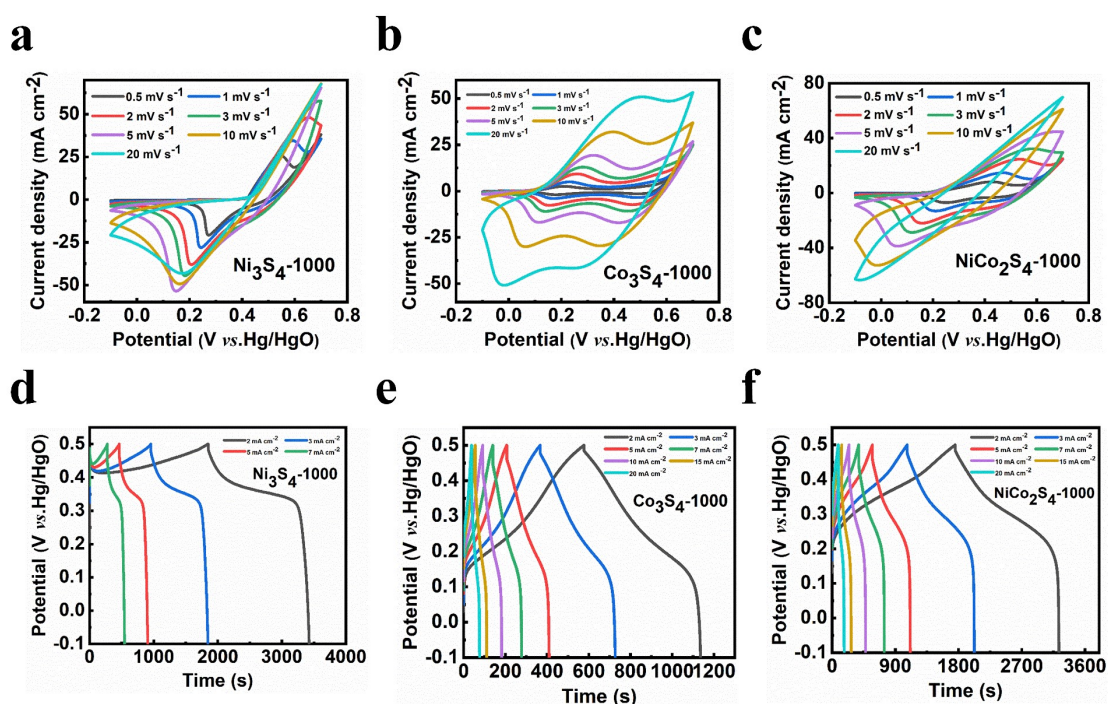

Fig. S10 CV curves of (a) Ni<sub>3</sub>S<sub>4</sub>-1000, (b) Co<sub>3</sub>S<sub>4</sub>-1000 and (c) NiCo<sub>2</sub>S<sub>4</sub>-1000 electrodes obtained at various scan rates. GCD profiles of (d) Ni<sub>3</sub>S<sub>4</sub>-1000, (e) Co<sub>3</sub>S<sub>4</sub>-1000 and (f) NiCo<sub>2</sub>S<sub>4</sub>-1000 electrodes obtained at different current densities.

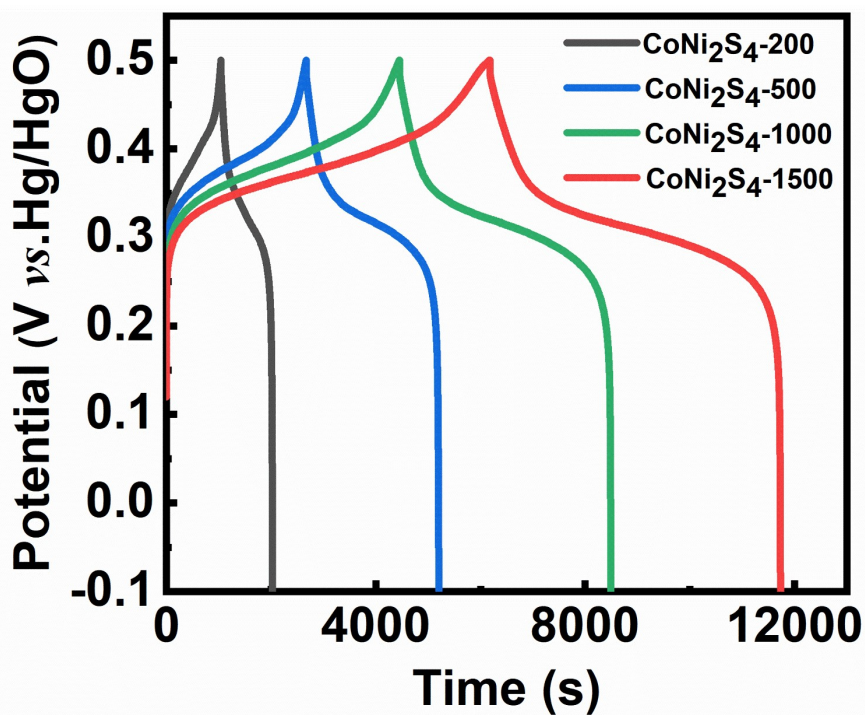

**Fig. S11** GCD curves of the CoNi<sub>2</sub>S<sub>4</sub>-200, CoNi<sub>2</sub>S<sub>4</sub>-500, CoNi<sub>2</sub>S<sub>4</sub>-1000 and CoNi<sub>2</sub>S<sub>4</sub>-1500 electrodes, respectively.

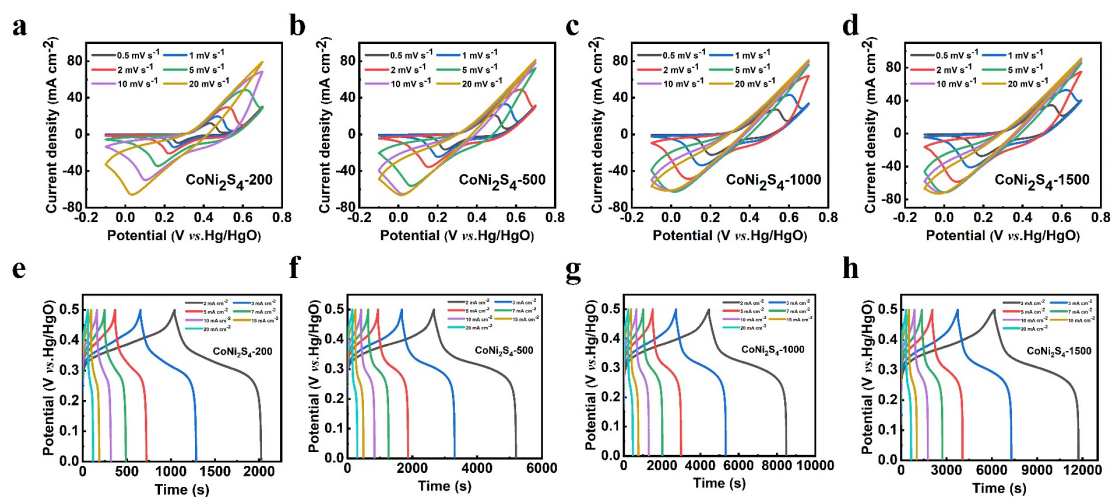

**Fig. S12** CV curves of (a) CoNi<sub>2</sub>S<sub>4</sub>-200, (b) CoNi<sub>2</sub>S<sub>4</sub>-500, (c) CoNi<sub>2</sub>S<sub>4</sub>-1000 and (d) CoNi<sub>2</sub>S<sub>4</sub>-1500 electrodes obtained at various scan rates. GCD profiles of (e) CoNi<sub>2</sub>S<sub>4</sub>-200, (f) CoNi<sub>2</sub>S<sub>4</sub>-500, (g) CoNi<sub>2</sub>S<sub>4</sub>-1000 and (h) CoNi<sub>2</sub>S<sub>4</sub>-1500 electrodes obtained at different current densities.

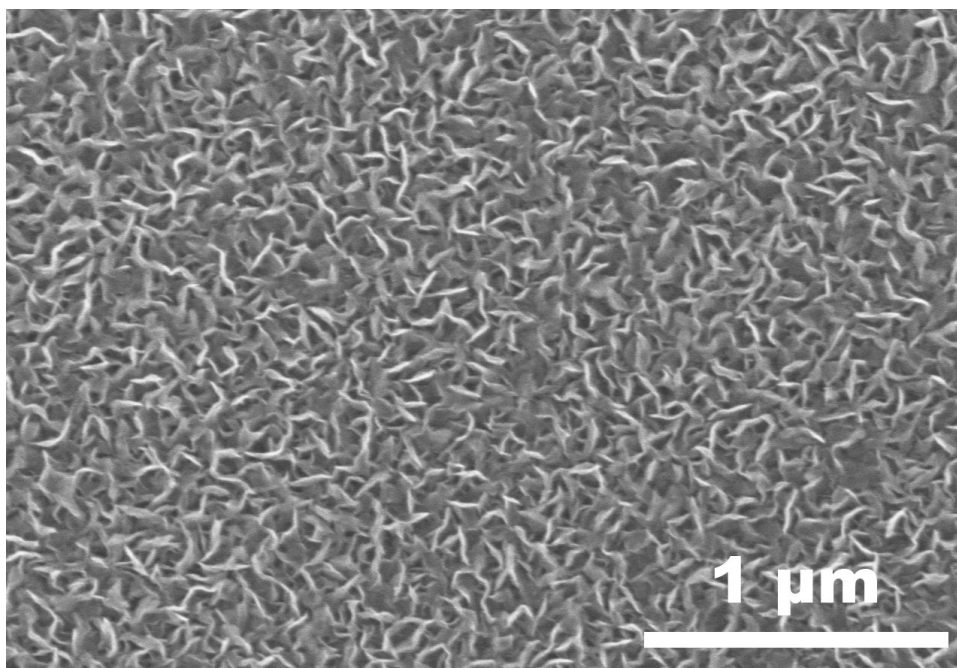

**Fig. S13** SEM image of CoNi<sub>2</sub>S<sub>4</sub>-1500 electrode after cyclic stability test.

**Table S1** Areal capacity and gravimetric capacity of Ni<sub>3</sub>S<sub>4</sub>-1000, Co<sub>3</sub>S<sub>4</sub>-1000, NiCo<sub>2</sub>S<sub>4</sub>-1000 and CoNi<sub>2</sub>S<sub>4</sub>-1000 electrodes.

| Electrode material                                       | Ni <sub>3</sub> S <sub>4</sub> -1000 | Co <sub>3</sub> S <sub>4</sub> -1000 | NiCo <sub>2</sub> S <sub>4</sub> -1000 | CoNi <sub>2</sub> S <sub>4</sub> -1000 |
|----------------------------------------------------------|--------------------------------------|--------------------------------------|----------------------------------------|----------------------------------------|
| Mass loading before vulcanization (mg cm <sup>-2</sup> ) | 13.00                                | 8.60                                 | 9.06                                   | 13.06                                  |
| Mass loading after vulcanization (mg cm <sup>-2</sup> )  | 11.20                                | 8.73                                 | 9.20                                   | 13.40                                  |
| Areal capacity (C cm <sup>-2</sup> )                     | 3.16                                 | 1.12                                 | 2.96                                   | 8.08                                   |
| gravimetric capacity (C g <sup>-1</sup> )                | 281.1                                | 128.3                                | 321.7                                  | 603.0                                  |

**Table S2** Comparison of the electrochemical performance of the CoNi<sub>2</sub>S<sub>4</sub>-1500 electrode with those of similar materials reported in the previous literatures.

| Electrode material | Mass loading | Areal capacity | Gravimetric capacity | Capacitance retention | Ref. |
|--------------------|--------------|----------------|----------------------|-----------------------|------|
|--------------------|--------------|----------------|----------------------|-----------------------|------|

|                                                        | (mg cm <sup>-2</sup> ) | (C cm <sup>-2</sup> ) | (C g <sup>-1</sup> ) |                                                     |           |
|--------------------------------------------------------|------------------------|-----------------------|----------------------|-----------------------------------------------------|-----------|
| CoNi <sub>2</sub> S <sub>4</sub> -1500/CC              | 18.80                  | 11.11                 | 591.0                | 85% after 7,000 cycles at 50 mA cm <sup>-2</sup>    | This work |
| H-NiCoSe <sub>2</sub>                                  | 7.0                    | -                     | 450                  | 92.1% after 5,000 cycles at 10 A g <sup>-1</sup>    | 1         |
| NiCo <sub>2</sub> S <sub>4</sub> /CC                   | 10.76                  | 5.23                  | 486                  | 84.47% after 5,000 cycles at 40 mA cm <sup>-2</sup> | 2         |
| Ni-Co-S/CC                                             | 8.84                   | 2.82                  | 319                  | 95% after 3,000 cycles at 10 A g <sup>-1</sup>      | 3         |
| NiCo <sub>2</sub> S <sub>4</sub> /NF                   | 9.984                  | 6.49                  | 650                  | 92% after 1,500 cycles at 20 mA cm <sup>-2</sup>    | 4         |
| Ni-decorated Co <sub>9</sub> S <sub>8</sub>            | 8.84                   | 2.82                  | 319                  | 89% after 8,000 cycles at 10 A g <sup>-1</sup>      | 5         |
| NiCo <sub>2</sub> S <sub>4</sub> @MoS <sub>2</sub> /NF | 11                     | 4.43                  | 356.66               | 88.9% after 6,000 cycles at 15 mA cm <sup>-2</sup>  | 6         |
| CoNi <sub>2</sub> S <sub>4</sub> /CC                   | 14.8                   | 10.87                 | 734                  | 88.8% after 5,000 cycles at 70 mA cm <sup>-2</sup>  | 7         |
| NiCo <sub>2</sub> S <sub>4</sub> /NF                   | 18.7                   | 5.39                  | 288                  | -                                                   | 8         |
| NiCo <sub>2</sub> S <sub>4</sub> /NF                   | 6                      | 7.91                  | 1318.3               | 99% after 5,000 cycles at 50 mA cm <sup>-2</sup>    | 9         |

## References

- 1 L. Hou, Y. Shi, C. Wu, Y. Zhang, Y. Ma, X. Sun, J. Sun, X. Zhang and C. Yuan, *Advanced Functional Materials*, 2018, **28**, 1705921.
- 2 X. Yu, J. Yu, W. Zhang, Q. Lv, W. Ren, L. Hou, Y. Fautrelle, X. Lu and X. Li, *Chemical Engineering Journal*, 2022, **446**, 137107.
- 3 Y. Wen, Y. Liu, T. Wang, Z. Wang, Y. Zhang, X. Wu, X. Chen, S. Peng and D. He, *ACS Applied Energy Materials*, 2021, **4**, 6531-6541.



- 4 T. Peng, Z. Qian, J. Wang, D. Song, J. Liu, Q. Liu and P. Wang, *Journal of Materials Chemistry A*, 2014, **2**, 19376-19382.
- 5 Y. Wen, Y. Liu, S. Dang, S. Tian, H. Li, Z. Wang, D. He, Z.S. Wu, G. Cao and S. Peng, *Journal of Power Sources*, 2019, **423**, 106-114.
- 6 Y. Tang, X. Liu, Y. Chen, L. Han, D. Dai, L. Liu, C. Wang, Y. Hua, X. Zhao and X. Liu, *Journal of Energy Storage*, 2022, **51**, 104518.
- 7 J. Ye, Q. Li, X. Ma, H. Chen, T. Yuan, X. Xu and F. Wang, *Applied Surface Science*, 2021, **554**, 149598.
- 8 F. Ren, Y. Ji, S. Tan and F. Chen, *Inorganic Chemistry Frontiers*, 2021, **8**, 72-78.
- 9 H. Chen, J. Jiang, L. Zhang, D. Xia, Y. Zhao, D. Guo, T. Qi and H. Wan, *Journal of Power Sources*, 2014, **254**, 249-257.
